# Supplementary material
Source: PubMed Central journal article supplement (PMC4256868)
Supplement: supp_pp.114.247494_247494Supplementary_Information_submit.pdf [file supp_pp.114.247494_247494Supplementary_Information_submit.pdf]

## Supplementary Information

### Dynamic balancing of isoprene carbon sources reflects photosynthetic and photorespiratory responses to temperature stress

\*<sup>1</sup>Kolby Jardine, <sup>1</sup>Jeffrey Chambers, <sup>3</sup>Eliane G. Alves, <sup>3</sup>Andrea Teixeira, <sup>3</sup>Sabrina Garcia, <sup>1</sup>Jennifer Holm, <sup>3</sup>Niro Higuchi, <sup>3</sup>Antonio Manzi, <sup>4</sup>Leif Abrell, <sup>5</sup>Jose D. Fuentes, <sup>2</sup>Lars K. Nielsen, <sup>1</sup>Margaret Torn, and <sup>2</sup>Claudia E. Vickers

<sup>1</sup>\*Corresponding author: Climate Science Department, Earth Science Division, Lawrence Berkeley National Laboratory, One Cyclotron Rd, building 64-241, Berkeley, CA 94720, USA, email ([kjardine@lbl.gov](mailto:kjardine@lbl.gov))

<sup>2</sup>Australian Institute for Bioengineering and Nanotechnology, The University of Queensland, Building 75, Cnr Cooper and College Rds, St. Lucia, QLD, 4072, Australia

<sup>3</sup>National Institute for Amazon Research (INPA), Ave. Andre Araujo 2936, Campus II, Building LBA, Manaus, AM 69.080-97, Brazil

<sup>4</sup>Department of Chemistry & Biochemistry and Department of Soil, Water and Environmental Science, University of Arizona, Tucson, AZ, USA

<sup>5</sup>Department of Meteorology, College of Earth and Mineral Sciences, Pennsylvania State University, University Park, PA, USA

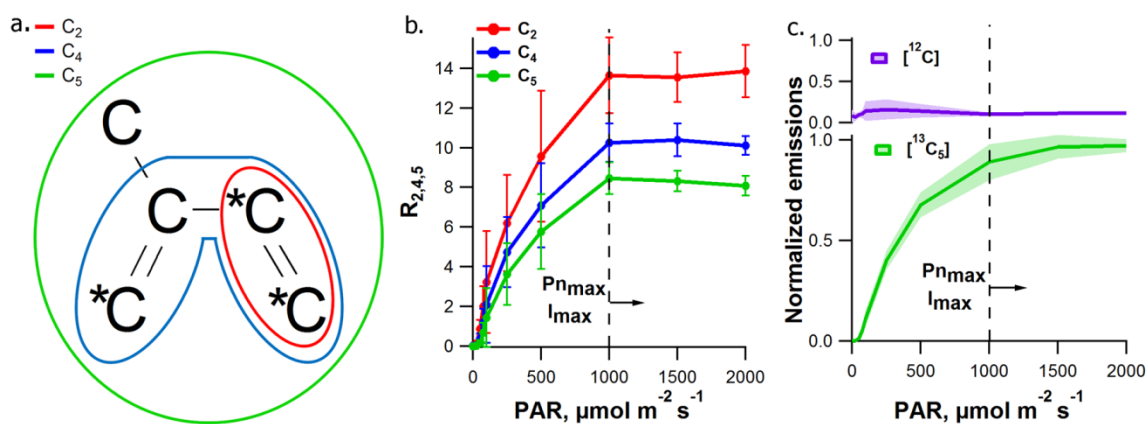

**Figure S1:** GC-MS <sup>13</sup>C-labeling analysis of isoprene emissions from 4 mango leaves during photosynthesis under <sup>13</sup>CO<sub>2</sub> as a function of PAR. **a)** Structure of isoprene GC-MS fragment ions with two carbon atoms (C<sub>2</sub>, red) and four carbon atoms (C<sub>4</sub>, blue) together with the isoprene parent ion with five carbon atoms (C<sub>5</sub>, green). Carbon atoms derived from glycerate-3-phosphate (GA3P) and pyruvate are shown as \*C and C respectively. **b)** Average <sup>13</sup>C/<sup>12</sup>C isotope ratios (R) of C<sub>2</sub> (2:<sup>13</sup>C/0:<sup>13</sup>C, R<sub>2</sub> = m/z 29/27) and C<sub>4</sub> (4:<sup>13</sup>C/0:<sup>13</sup>C, R<sub>4</sub> = m/z 57/53) fragment ions and C<sub>5</sub> (5:<sup>13</sup>C/0:<sup>13</sup>C, R<sub>5</sub> = m/z 73/68) parent ions. **c)** Average emission rates for [<sup>12</sup>C]isoprene (m/z 68) and [<sup>13</sup>C<sub>5</sub>]isoprene (m/z 73) normalized to the maximum emissions of [<sup>13</sup>C<sub>5</sub>]isoprene. [<sup>12</sup>C]isoprene emissions were low and variable while [<sup>13</sup>C<sub>5</sub>]isoprene increased with PAR. Vertical dashed lines represent optimum PAR range for net photosynthesis (Pn<sub>max</sub>) and isoprene emissions (I<sub>max</sub>) determined from the <sup>12</sup>CO<sub>2</sub> studies (see **Figure 1** of the main manuscript).
